# Supplementary material for: Inference of Quantitative Models of Bacterial Promoters from Time-Series Reporter Gene Data
Source: PubMed Central journal article supplement (PMC4295839; doi:10.1371/journal.pcbi.1004028), 2015-01-15
Supplement: pcbi.1004028.s001.pdf [file pcbi.1004028.s001.pdf]

## Supplementary Text S1: Strains and plasmids<sup>a</sup>

Diana Stefan<sup>1,2</sup>, Corinne Pinel<sup>1,2</sup>, Stéphane Pinhal<sup>1,2</sup>, Eugenio Cinquemani<sup>1</sup>, Johannes Geiselmann<sup>1,2</sup>,  
Hidde de Jong<sup>1,\*</sup>

1 INRIA Grenoble – Rhône-Alpes, Grenoble, France

2 Laboratoire Interdisciplinaire de Physique (LIPhy, CNRS UMR 5588), Université  
Joseph Fourier, Grenoble, France

\* Corresponding author. INRIA Grenoble—Rhône-Alpes, 655 avenue de l’Europe,  
Monbonnot, 38334 Saint-Ismier Cedex, France. Tel.: +33476615335, Fax: +33456527120,  
Email: Hidde.de-Jong@inria.fr

The *E. coli* strains used in this study are all derived from the wild-type strain BW25113. In particular, we used the  $\Delta rpoS$ ,  $\Delta cpxR$  and  $\Delta csgD$  deletion strains of BW25113 taken from the Keio collection [1]. The mutants were reconstructed in our laboratory [2] in order to eliminate the kanamycin resistance gene present in the original deletion strains (Table 1 in this text).

| Strain        | Characteristics                              | Reference or source |
|---------------|----------------------------------------------|---------------------|
| WT            | <i>E. coli</i> BW25113                       | [1]                 |
| WTpRM         | <i>E. coli</i> BW25113 pRM- <i>gfp::intS</i> | This study          |
| $\Delta rpoS$ | <i>E. coli</i> BW25113 $\Delta rpoS$         | [2]                 |
| $\Delta cpxR$ | <i>E. coli</i> BW25113 $\Delta cpxR$         | [2]                 |
| $\Delta csgD$ | <i>E. coli</i> BW25113 $\Delta csgD$         | [2]                 |

**Table 1. Strains used in this study.**

The wild-type and mutant strains were transformed with plasmids bearing a *gfp* reporter gene, encoding the stable GFPmut2 reporter (Table 2 in this text). The reporter plasmids for the genes *tar*, *fliA*, *flgM*, and *flgA* were selected from the plasmid library developed at the Weizmann Institute [3]. These low-copy pUA66*gfp* plasmids are kanamycin-resistant and have the origin of replication of the pSC101 plasmid. The reporter plasmids are transcriptional fusions of the promoter regions of the genes of interest and the *gfp* sequence. The same vector was used to construct a reporter for the constitutive promoter pRM of  $\lambda$  phage, by cloning the pRM promoter region from the pZE1RM*gfp* plasmid used in [4] into the pUA66*gfp* plasmid backbone. Table 3 in this text lists the primer sequences used for the construction of this pUA66pRM-*gfp* plasmid. The above-mentioned plasmids were transformed into the wild-type and deletion strains of Table 2 in this text. We verified that the plasmids do not modify the growth of the transformed strains. All strains and plasmids were verified by PCR.

The pRM promoter fused with the *gfp* reporter gene was also inserted into the chromosome of the BW25113 wild-type strain as reference for the qRT-PCR assays. The WTpRM strain was constructed according to the linear DNA recombination protocol of Sharan *et al.* [5]. The pRM promoter region along with the gene encoding the GFPmut3 reporter were introduced into the *intS* locus on the chromosome of BW25113 WT strain, by means of the  $\lambda$  Red system. The pRM-*gfpmut3* sequence was recovered from the pZE1RM*gfp* plasmid used in [4]. The recombineering protocols use the bacteriophage  $\lambda$  Red system that includes the phage recombination genes *gam*, *bet* and *exo*. The protein encoded by *gam*, Gam, prevents *E. coli* nuclease from degrading linear DNA fragments [6, 7] thus allowing preservation of transformed linear DNA *in vivo*. The *bet* gene product, Beta, is a ssDNA binding protein that promotes annealing of two complementary DNA molecules [8], and the *exo* gene product, Exo, has a 5 to 3dsDNA exonuclease

<sup>a</sup>This text contains supplementary information for the paper “Inference of quantitative models of bacterial promoters from time-series reporter gene data”.

activity [9]. Working together these latter two proteins insert linear DNA at the desired target, creating genetic recombinants.

| Plasmid               | Characteristics                                            | Reference or source |
|-----------------------|------------------------------------------------------------|---------------------|
| pUA66 <i>gfp</i>      | Kan <sup>r</sup> , pSC101 <i>ori</i> , <i>gfpmut2</i>      | [3]                 |
| pUA66 <i>fliA-gfp</i> | Kan <sup>r</sup> , pSC101 <i>ori</i> , <i>fliA-gfpmut2</i> | [3]                 |
| pUA66 <i>flgM-gfp</i> | Kan <sup>r</sup> , pSC101 <i>ori</i> , <i>flgM-gfpmut2</i> | [3]                 |
| pUA66 <i>flgA-gfp</i> | Kan <sup>r</sup> , pSC101 <i>ori</i> , <i>flgA-gfpmut2</i> | [3]                 |
| pUA66 <i>tar-gfp</i>  | Kan <sup>r</sup> , pSC101 <i>ori</i> , <i>tar-gfpmut2</i>  | [3]                 |
| pUA66pRM- <i>gfp</i>  | Kan <sup>r</sup> , pSC101 <i>ori</i> , pRM- <i>gfpmut2</i> | This study          |

**Table 2. Plasmids used in this study.**

| Plasmid              | Primer sequence                                                                                                                                                                                                                          |
|----------------------|------------------------------------------------------------------------------------------------------------------------------------------------------------------------------------------------------------------------------------------|
| pUA66pRM- <i>gfp</i> | pRM-fw: GAGGC CCTTT CGTCT TCACC TCGAG CCTAT CACCG CCAGA<br>pRM-re: TTCTT AAATC TAGAG GATCC GGTTT CTTTT TTGTG CTGAT<br>gfp-fw: ATCAG CACAA AAAAG AAACC GGATC CTCTA GATTT AAGAA<br>gfp-re: TCTGG CGGTG ATAGG CTCGA GGTGA AGACG AAAGG GCCTC |

**Table 3. Primers used for the construction of pUA66pRM-*gfp* plasmid.** The pUA66pRM-*gfp* plasmid was constructed with the Gibson Assembly method [10]. The pUA66*gfp* plasmid backbone was amplified using the primers *gfp-fw* and *gfp-re*. The pRM promoter region was amplified from the pZE1RM*gfp* plasmid [4] using the primers pRM-fw and pRM-re. pRM-fw and pRM-re contain the XhoI and BamHI restriction sites, respectively.

## References

1. Baba T, Ara T, Hasegawa M, Takai Y, Okumura Y, et al. (2006) Construction of *Escherichia coli* K-12 in-frame, single-gene knockout mutants: the Keio collection. *Mol Syst Biol* 2: 2006.0008.
2. Dudin O, Geiselmann J, Oqasawara H, Ishihama A, Lacour S (2014) Repression of flagellar genes in exponential phase by CsgD and CpxR, two crucial modulators of *Escherichia coli* biofilm formation. *J Bacteriol* 196: 707-15.
3. Zaslaver A, Bren A, Ronen M, Itzkovitz S, Kikoin I, et al. (2006) A comprehensive library of fluorescent transcriptional reporters for *Escherichia coli*. *Nat Methods* 3: 623-8.
4. Berthoumieux S, de Jong H, Baptist G, Pinel C, Ranquet C, et al. (2013) Shared control of gene expression in bacteria by transcription factors and global physiology of the cell. *Mol Syst Biol* 9: 634.
5. Sharan S, Thomason L, Kuznetsov S, Court D (2009) Recombineering: a homologous recombination-based method of genetic engineering. *Nat Protocols* 4: 206-23.
6. Karu A, Sakaki Y, Echols H, Linn S (1975) The gamma protein specified by bacteriophage lambda. Structure and inhibitory activity for the RecBC enzyme of *Escherichia coli*. *J Biol Chem* 250: 7377-87.
7. Murphy K (1991) Lambda Gam protein inhibits the helicase and chi-stimulated recombination activities of *Escherichia coli* RecBCD enzyme. *J Bacteriol* 173: 5808-21.

8. Karakousis G, Ye N, Li Z, Chiu S, Reddy G, et al. (1998) The beta protein of phage lambda binds preferentially to an intermediate in DNA renaturation. *J Mol Biol* 276: 721-31.
9. Cassuto E, Lash T, Sriprakash K, Radding C (1971) Role of exonuclease and beta protein of phage lambda in genetic recombination. V. Recombination of lambda DNA *in vitro*. *Proc Natl Acad Sci USA* 68: 1639-43.
10. Gibson D (2011) Enzymatic assembly of overlapping DNA fragments. *Methods Enzymol* 498: 349-61.
