# Supplementary material for: Inference of Quantitative Models of Bacterial Promoters from Time-Series Reporter Gene Data
Source: PubMed Central journal article supplement (PMC4295839; doi:10.1371/journal.pcbi.1004028), 2015-01-15
Supplement: pcbi.1004028.s004.pdf [file pcbi.1004028.s004.pdf]

# Supplementary Text S4: Derivation of regulation function of motility genes<sup>a</sup>

Diana Stefan<sup>1,2</sup>, Corinne Pinel<sup>1,2</sup>, Stéphane Pinhal<sup>1,2</sup>, Eugenio Cinquemani<sup>1</sup>, Johannes Geiselmann<sup>1,2</sup>, Hidde de Jong<sup>1,\*</sup>

1 INRIA Grenoble – Rhône-Alpes, Grenoble, France

2 Laboratoire Interdisciplinaire de Physique (LIPhy, CNRS UMR 5588), Université Joseph Fourier, Grenoble, France

\* Corresponding author. INRIA Grenoble—Rhône-Alpes, 655 avenue de l'Europe, Monbonnot, 38334 Saint-Ismier Cedex, France. Tel.: +33476615335, Fax: +33456527120, Email: Hidde.de-Jong@inria.fr

We develop a kinetic model for the regulation of the expression of *tar* as a function of the total concentrations of FliA and FlgM (see Figure 1 in main text). The model is based on a quasi-equilibrium approximation of the mass-action kinetics for the formation of the FliA·FlgM complex, and a phenomenological Hill-type regulatory law of *tar* expression by free FliA.

Let  $p_{A,free}$ ,  $p_{M,free}$  and  $p_{AM}$  denote the concentrations of free FliA, free FlgM and FliA·FlgM, in that order, and let  $p_A$ ,  $p_M$  denote total concentrations of FliA and FlgM. Assuming complex formation and dissociation are fast events relative to gene expression and protein degradation, we make the approximation

$$\frac{d}{dt}p_{AM} = k^+p_{A,free} \cdot p_{M,free} - k^-p_{AM} = 0,$$

with  $k^- > 0$  and  $k^+ > 0$ . Using the facts that  $p_A = p_{A,free} + p_{AM}$  and  $p_M = p_{M,free} + p_{AM}$ , substitution into the above to eliminate  $p_{M,free}$  and  $p_{AM}$  from the equation yields

$$k^+p_{A,free} \cdot (p_M - (p_A - p_{A,free})) - k^-(p_A - p_{A,free}) = 0,$$

which is a second-order polynomial equation in  $p_{A,free}$ . The solution of the equation that satisfies  $0 \leq p_{A,free} \leq p_A$  is

$$p_{A,free}(p_A, p_M) = \frac{1}{2} \left( \sqrt{(K + p_M - p_A)^2 + 4Kp_A} - (K + p_M - p_A) \right),$$

with  $K = k^-/k^+$ , which is a function of the concentrations  $p_A$  and  $p_M$ . In accordance with Figure 1 of the main text, only the free FliA molecules regulate the expression of *ptar*, and we quantify the regulatory effect by the law

$$\frac{p_{A,free}^n}{p_{A,free}^n + \theta^n},$$

with  $n \geq 1$ . Multiplying by maximal synthesis rate  $k_1$  and adding basal (unregulated) synthesis rate  $k_0$  leads to model Eq. 1- 2 in the main text.

Note that, in accordance with the expected regulatory pattern, the function

$$k_0 + k_1 \cdot \frac{p_{A,free}^n(p_A, p_M)}{p_{A,free}^n(p_A, p_M) + \theta^n}$$

---

<sup>a</sup>This text contains supplementary information for the paper “Inference of quantitative models of bacterial promoters from time-series reporter gene data”.

is increasing in  $p_A$  and decreasing in  $p_M$ . To verify this, it suffices to show that derivatives with respect to  $p_A$  and  $p_M$  are nonnegative and nonpositive, respectively. Ignoring  $k_0$  and  $k_1$  without loss of generality, the derivative of  $p_{A,free}$  with respect to  $p_A$  can be written as

$$\frac{1}{2} + \frac{1}{2} \cdot \frac{-(p_M - p_A + K) + 2K}{\sqrt{(p_M - p_A + K)^2 + 4Kp_A}}.$$

This expression is obviously positive if  $p_M - p_A + K \leq 0$ . If instead  $p_M - p_A + K > 0$ , note that the expression is still positive if the square of the fraction,

$$\frac{((p_M - p_A + K) - 2K)^2}{(p_M - p_A + K)^2 + 4Kp_A},$$

is smaller than 1. But this is apparent since, under  $p_M - p_A + K > 0$ , the numerator is no bigger than  $(p_M - p_A + K)^2$ , whereas the denominator is no smaller than the same quantity. Similarly, the derivative of  $p_{A,free}$  with respect to  $p_M$  can be written as

$$-\frac{1}{2} + \frac{1}{2} \cdot \frac{p_M - p_A + K}{\sqrt{(p_M - p_A + K)^2 + 4Kp_A}}.$$

This expression is obviously negative if  $(p_M - p_A + K) \leq 0$ . If instead  $(p_M - p_A + K) > 0$ , note that the square root is no smaller than  $(p_M - p_A + K)$ , hence the rightmost fraction is no bigger than 1, *i.e.* the overall expression is again negative.

The additional regulatory effect of global physiological effects is quantified via further multiplication by a function  $f_{const}(t)$ , as in the *Results* section of the main text. Monotonicity with respect to  $p_A$  and  $p_M$  remains unchanged. In addition,  $f$  is increasing in  $f_{const}$ . In all cases, the model depends on the (nonnegative) parameters  $k_0, k_1, n, \theta, K$ .
